# Supplementary material for: HO2˙ as a potential reactant for the bimolecular reaction of tert-butoxy radicals in the atmosphere
Source: Royal Society of Chemistry journal article supplement (doi:10.1039/d4cp02800g), 2024-01-01
Supplement: d4cp02800g1.pdf [file d4cp02800g1.pdf]

**ESI of**

**$\text{HO}_2^\bullet$  as a potential reactant for the bimolecular  
reaction of tert-butoxy radical in the atmosphere**

Philips Kumar Rai, Amit Kumar, and Pradeep Kumar\*

*Department of Chemistry, Malaviya National Institute of Technology Jaipur, Jaipur,  
302017, India*

E-mail: [pradeep.chy@mnit.ac.in](mailto:pradeep.chy@mnit.ac.in)

Table S1: Cartesian coordinates and all normal mode frequencies of the optimized geometries calculated at M062X/aug-cc-pVTZ level of theory.

| Species           | Cartesian coordinate (Å) |           |           | Frequencies (cm <sup>-1</sup> ) |        |        |        |        |
|-------------------|--------------------------|-----------|-----------|---------------------------------|--------|--------|--------|--------|
| HO <sub>2</sub> • | O                        | 0.055047  | -0.599984 | 0.000000                        |        |        |        |        |
|                   | O                        | 0.055047  | 0.708041  | 0.000000                        | 1253.4 | 1459.6 | 3690.2 |        |
|                   | H                        | -0.880751 | -0.864454 | 0.000000                        |        |        |        |        |
| tBuO•             | C                        | -0.682607 | -1.226327 | -0.435446                       |        |        |        |        |
|                   | H                        | -0.205244 | -2.108659 | -0.014019                       |        |        |        |        |
|                   | H                        | -1.735875 | -1.221114 | -0.162375                       | 182.1  | 247.6  | 260.1  | 331.5  |
|                   | H                        | -0.593082 | -1.253404 | -1.521177                       | 331.9  | 384.7  | 412.2  | 430.0  |
|                   | C                        | 0.011290  | 0.055192  | 0.072287                        | 763.4  | 902.4  | 904.4  | 935.3  |
|                   | C                        | 1.497128  | 0.027822  | -0.283531                       | 962.6  | 1003.6 | 1026.0 | 1189.6 |
|                   | H                        | 1.995737  | 0.904813  | 0.128587                        | 1201.8 | 1271.8 | 1378.7 | 1382.8 |
|                   | H                        | 1.964493  | -0.864009 | 0.131027                        | 1416.2 | 1468.1 | 1482.3 | 1488.3 |
|                   | H                        | 1.632456  | 0.031812  | -1.365336                       | 1494.7 | 1496.1 | 1521.4 | 3061.7 |
|                   | C                        | -0.684610 | 1.292399  | -0.493448                       | 3066.0 | 3070.9 | 3135.8 | 3141.2 |
|                   | H                        | -0.591573 | 1.321751  | -1.579310                       | 3147.6 | 3148.8 | 3153.0 | 3161.4 |
|                   | H                        | -1.740123 | 1.282764  | -0.226160                       |        |        |        |        |
|                   | H                        | -0.231033 | 2.195166  | -0.084986                       |        |        |        |        |
| O                 | -0.161785                | -0.016138 | 1.440979  |                                 |        |        |        |        |
|                   | C                        | 2.439591  | -0.416985 | -0.319422                       |        |        |        |        |
|                   | H                        | 2.560247  | -1.499238 | -0.280987                       | 42.7   | 71.6   | 91.9   | 122.5  |
|                   | H                        | 2.710715  | -0.069913 | -1.315037                       | 188.8  | 212.0  | 260.6  | 263.7  |
|                   | H                        | 3.114168  | 0.030752  | 0.409810                        | 328.8  | 344.4  | 413.8  | 419.3  |
|                   | C                        | 0.995679  | -0.038418 | -0.004483                       | 469.0  | 610.0  | 758.2  | 861.9  |
|                   | C                        | 0.555506  | -0.512842 | 1.378932                        | 927.5  | 937.2  | 968.5  | 1019.7 |
|                   | H                        | -0.466158 | -0.194485 | 1.580823                        | 1037.7 | 1161.8 | 1220.0 | 1268.3 |

|                 |          |           |           |           |         |        |        |        |
|-----------------|----------|-----------|-----------|-----------|---------|--------|--------|--------|
| RC              | H        | 0.610797  | -1.599792 | 1.437295  | 1284.1  | 1375.5 | 1388.7 | 1418.1 |
|                 | H        | 1.213283  | -0.095125 | 2.140655  | 1466.1  | 1484.9 | 1490.1 | 1491.7 |
|                 | C        | 0.798531  | 1.496383  | -0.125379 | 1499.5  | 1522.6 | 1556.3 | 3065.2 |
|                 | H        | 1.443797  | 1.960055  | 0.620396  | 3069.0  | 3072.2 | 3140.1 | 3145.6 |
|                 | H        | 1.087567  | 1.838739  | -1.116472 | 3152.3  | 3154.9 | 3157.6 | 3174.5 |
|                 | H        | -0.238924 | 1.755794  | 0.072272  | 3351.5  |        |        |        |
|                 | O        | 0.148823  | -0.522591 | -0.983469 |         |        |        |        |
|                 | O        | -2.510267 | -0.589205 | -0.370423 |         |        |        |        |
|                 | H        | -1.564993 | -0.692664 | -0.643717 |         |        |        |        |
|                 | O        | -2.539349 | 0.536427  | 0.293526  |         |        |        |        |
| TS <sub>H</sub> | C        | -2.325685 | -0.562737 | 0.144488  |         |        |        |        |
|                 | H        | -2.449644 | -1.434326 | -0.493949 | -1030.6 | 26.4   | 82.6   | 105.2  |
|                 | H        | -2.513609 | -0.836431 | 1.179824  | 173.8   | 189.6  | 263.2  | 265.7  |
|                 | H        | -3.023804 | 0.216064  | -0.161641 | 329.0   | 336.4  | 361.7  | 401.9  |
|                 | C        | -0.893648 | 0.018460  | -0.008137 | 461.0   | 533.1  | 750.7  | 827.9  |
|                 | C        | -0.623981 | 0.371732  | -1.469028 | 922.0   | 926.9  | 966.8  | 986.7  |
|                 | H        | 0.395402  | 0.738977  | -1.581676 | 1035.1  | 1112.1 | 1160.3 | 1195.7 |
|                 | H        | -0.756303 | -0.508340 | -2.096940 | 1265.4  | 1370.5 | 1381.1 | 1414.4 |
|                 | H        | -1.309258 | 1.150836  | -1.802212 | 1464.6  | 1481.2 | 1487.4 | 1494.4 |
|                 | C        | -0.723302 | 1.219979  | 0.924091  | 1497.4  | 1522.3 | 1539.5 | 1728.5 |
|                 | H        | -1.401101 | 2.019695  | 0.626138  | 3066.6  | 3070.1 | 3072.2 | 3144.5 |
|                 | H        | -0.940769 | 0.930385  | 1.950736  | 3148.6  | 3153.1 | 3156.7 | 3158.4 |
|                 | H        | 0.298933  | 1.590799  | 0.866428  | 3171.9  |        |        |        |
|                 | O        | -0.102623 | -1.032431 | 0.409856  |         |        |        |        |
|                 | O        | 2.334353  | -0.685704 | 0.161779  |         |        |        |        |
|                 | H        | 1.319293  | -0.886232 | 0.244389  |         |        |        |        |
| O               | 2.490839 | 0.559882  | -0.106582 |           |         |        |        |        |

|       |           |           |           |           |        |        |        |        |
|-------|-----------|-----------|-----------|-----------|--------|--------|--------|--------|
| PC    | C         | 2.620874  | 0.120703  | -0.015811 |        |        |        |        |
|       | H         | 2.949502  | 0.547610  | -0.962707 | 25.2   | 41.3   | 51.1   | 57.8   |
|       | H         | 2.949820  | 0.775264  | 0.790558  | 70.2   | 201.7  | 268.3  | 277.7  |
|       | H         | 3.086524  | -0.856447 | 0.111032  | 315.6  | 346.6  | 351.7  | 421.8  |
|       | C         | 1.106636  | -0.003499 | 0.000403  | 466.9  | 472.4  | 771.0  | 925.5  |
|       | C         | 0.624047  | -0.878388 | -1.151401 | 938.9  | 962.7  | 963.5  | 1035.6 |
|       | H         | -0.466393 | -0.939819 | -1.154629 | 1051.2 | 1167.0 | 1258.8 | 1275.3 |
|       | H         | 0.948820  | -0.456173 | -2.101785 | 1365.5 | 1399.9 | 1410.2 | 1426.3 |
|       | H         | 1.017768  | -1.891435 | -1.063263 | 1473.6 | 1483.9 | 1487.1 | 1500.2 |
|       | C         | 0.624290  | -0.557420 | 1.336674  | 1509.0 | 1520.0 | 1754.4 | 3053.2 |
|       | H         | 1.018338  | -1.559553 | 1.508553  | 3056.6 | 3067.2 | 3121.2 | 3126.8 |
|       | H         | 0.948990  | 0.092402  | 2.148557  | 3139.3 | 3140.0 | 3145.2 | 3146.6 |
|       | H         | -0.466071 | -0.616249 | 1.355741  | 3864.3 |        |        |        |
|       | O         | 0.618448  | 1.328130  | -0.171187 |        |        |        |        |
|       | O         | -2.697211 | 0.609444  | -0.073659 |        |        |        |        |
|       | H         | -0.342563 | 1.305076  | -0.172371 |        |        |        |        |
| O     | -3.108714 | -0.498705 | 0.059986  |           |        |        |        |        |
| tBuOH | C         | -0.717550 | -1.250377 | -0.545948 |        |        |        |        |
|       | H         | -0.274679 | -2.155480 | -0.131838 | 201.9  | 267.0  | 280.2  | 306.0  |
|       | H         | -1.786990 | -1.263594 | -0.338680 | 344.8  | 347.6  | 420.5  | 465.5  |
|       | H         | -0.567461 | -1.246080 | -1.625067 | 471.9  | 771.1  | 925.0  | 938.9  |
|       | C         | -0.080476 | -0.023819 | 0.085037  | 961.6  | 963.9  | 1035.0 | 1051.0 |
|       | C         | 1.425242  | -0.013293 | -0.153914 | 1165.9 | 1259.6 | 1275.4 | 1364.7 |
|       | H         | 1.883193  | 0.853072  | 0.328378  | 1399.5 | 1409.4 | 1426.2 | 1473.9 |
|       | H         | 1.875022  | -0.915763 | 0.258551  | 1484.1 | 1487.6 | 1500.3 | 1509.5 |
|       | H         | 1.650883  | 0.036892  | -1.219401 | 1520.1 | 3050.3 | 3054.3 | 3067.8 |

|                 |   |           |           |           |         |        |        |        |
|-----------------|---|-----------|-----------|-----------|---------|--------|--------|--------|
|                 | C | -0.720902 | 1.252836  | -0.448285 | 3118.7  | 3124.7 | 3139.8 | 3140.9 |
|                 | H | -0.568208 | 1.345995  | -1.523785 | 3145.1  | 3148.1 | 3864.5 |        |
|                 | H | -1.791074 | 1.246953  | -0.244394 |         |        |        |        |
|                 | H | -0.282034 | 2.130428  | 0.031433  |         |        |        |        |
|                 | O | -0.343468 | -0.144394 | 1.483918  |         |        |        |        |
|                 | H | 0.041656  | 0.611591  | 1.935452  |         |        |        |        |
| O <sub>2</sub>  | O | 0.000000  | 0.000000  | 0.594930  | 1754.4  |        |        |        |
|                 | O | 0.000000  | 0.000000  | -0.594930 |         |        |        |        |
|                 | C | 0.066257  | 0.000017  | -0.022338 |         |        |        |        |
|                 | C | -1.210896 | -0.000351 | -0.814405 | -1851.0 | 178.9  | 233.8  | 309.5  |
|                 | C | 0.898844  | -1.261436 | -0.123257 | 336.0   | 357.2  | 409.0  | 470.1  |
|                 | C | 0.897755  | 1.262214  | -0.123019 | 650.3   | 830.5  | 883.9  | 921.3  |
|                 | O | -0.725289 | -0.000518 | 1.188997  | 956.4   | 977.5  | 1022.7 | 1027.8 |
|                 | H | -1.720122 | -0.000911 | 0.414255  | 1116.2  | 1175.7 | 1293.4 | 1310.3 |
| TS <sub>I</sub> | H | -1.517800 | 0.927159  | -1.282898 | 1404.4  | 1412.7 | 1433.5 | 1474.7 |
|                 | H | -1.516760 | -0.927612 | -1.284061 | 1489.1  | 1496.2 | 1507.2 | 1974.0 |
|                 | H | 0.263393  | -2.141434 | -0.031325 | 3043.7  | 3047.6 | 3117.9 | 3119.3 |
|                 | H | 1.424045  | -1.300879 | -1.078164 | 3124.3  | 3129.3 | 3131.2 | 3231.2 |
|                 | H | 1.637241  | -1.284864 | 0.678553  |         |        |        |        |
|                 | H | 1.421998  | 1.302726  | -1.078408 |         |        |        |        |
|                 | H | 0.261637  | 2.141598  | -0.029899 |         |        |        |        |
|                 | H | 1.636920  | 1.285702  | 0.678083  |         |        |        |        |
|                 | C | -0.038150 | 0.029445  | 0.014058  |         |        |        |        |
|                 | C | -1.114346 | 0.020996  | -1.019411 | 86.1    | 231.7  | 278.5  | 317.4  |
|                 | C | 0.772692  | -1.262193 | -0.031632 | 328.2   | 349.9  | 410.6  | 449.9  |
|                 | C | 0.872411  | 1.242839  | -0.159156 | 471.6   | 545.7  | 783.5  | 919.6  |
|                 | O | -0.620515 | 0.191855  | 1.312498  | 946.1   | 950.3  | 1002.7 | 1023.7 |

|                 |   |           |           |           |        |        |        |        |
|-----------------|---|-----------|-----------|-----------|--------|--------|--------|--------|
| (OH)tBu•        | H | -1.282861 | -0.495317 | 1.431372  | 1139.3 | 1239.1 | 1278.7 | 1346.3 |
|                 | H | -1.889270 | 0.772413  | -0.971198 | 1395.0 | 1410.2 | 1455.0 | 1478.5 |
|                 | H | -1.044342 | -0.606913 | -1.894995 | 1486.2 | 1499.8 | 1509.3 | 3056.0 |
|                 | H | 0.123885  | -2.124782 | 0.130219  | 3064.3 | 3127.0 | 3139.8 | 3146.9 |
|                 | H | 1.259229  | -1.378563 | -1.000495 | 3151.1 | 3165.4 | 3275.5 | 3855.2 |
|                 | H | 1.533828  | -1.246946 | 0.747036  |        |        |        |        |
|                 | H | 1.383412  | 1.202421  | -1.120220 |        |        |        |        |
|                 | H | 0.284261  | 2.157761  | -0.107771 |        |        |        |        |
|                 | H | 1.613912  | 1.258222  | 0.640188  |        |        |        |        |
| TS <sub>D</sub> | C | 0.707690  | 1.287667  | -0.480101 |        |        |        |        |
|                 | H | 0.224911  | 2.139859  | -0.008351 | -588.3 | 134.8  | 219.2  | 230.6  |
|                 | H | 1.787478  | 1.389104  | -0.348992 | 239.5  | 248.2  | 385.9  | 450.2  |
|                 | H | 0.496757  | 1.277451  | -1.547730 | 508.1  | 616.4  | 642.3  | 789.4  |
|                 | C | 0.284427  | 0.000000  | 0.211402  | 901.6  | 959.4  | 968.7  | 1076.5 |
|                 | C | -1.717849 | 0.000000  | -0.339965 | 1081.2 | 1228.7 | 1387.1 | 1393.4 |
|                 | H | -2.055292 | -0.916180 | 0.120919  | 1421.3 | 1437.8 | 1472.7 | 1473.5 |
|                 | H | -2.055292 | 0.916180  | 0.120919  | 1478.9 | 1492.6 | 1578.8 | 3060.3 |
|                 | H | -1.627199 | 0.000000  | -1.417570 | 3064.0 | 3111.6 | 3131.3 | 3135.9 |
|                 | C | 0.707690  | -1.287667 | -0.480101 | 3168.3 | 3170.4 | 3271.4 | 3282.0 |
|                 | H | 0.496757  | -1.277452 | -1.547730 |        |        |        |        |
|                 | H | 1.787477  | -1.389104 | -0.348992 |        |        |        |        |
|                 | H | 0.224911  | -2.139859 | -0.008351 |        |        |        |        |
|                 | O | 0.103468  | 0.000000  | 1.439809  |        |        |        |        |
|                 | C | 1.282300  | -0.610596 | -0.000020 |        |        |        |        |
|                 | H | 2.137008  | 0.058802  | -0.000170 |        |        |        |        |
|                 | H | 1.315530  | -1.258313 | 0.877272  | 39.5   | 146.8  | 384.1  | 494.3  |
|                 | H | 1.315478  | -1.258766 | -0.876963 | 541.1  | 806.8  | 889.1  | 898.6  |

|                              |           |           |           |           |         |         |         |         |
|------------------------------|-----------|-----------|-----------|-----------|---------|---------|---------|---------|
| Acetone                      | C         | 0.000000  | 0.186064  | 0.000013  | 1087.3  | 1126.4  | 1251.1  | 1388.8  |
|                              | C         | -1.282300 | -0.610596 | -0.000020 | 1398.1  | 1462.6  | 1468.9  | 1473.7  |
|                              | H         | -1.315478 | -1.258766 | -0.876963 | 1492.9  | 1848.5  | 3063.4  | 3069.0  |
|                              | H         | -1.315530 | -1.258313 | 0.877272  | 3125.0  | 3131.9  | 3180.6  | 3181.6  |
|                              | H         | -2.137008 | 0.058802  | -0.000170 |         |         |         |         |
|                              | O         | 0.000000  | 1.390916  | -0.000014 |         |         |         |         |
| CH <sub>3</sub> <sup>•</sup> | C         | 0.000000  | -0.000471 | 0.000000  |         |         |         |         |
|                              | H         | -0.535164 | 0.058870  | 0.932152  | 421.7   | 1413.2  | 1413.2  | 3141.2  |
|                              | H         | -0.535164 | 0.058870  | -0.932152 | 3317.2  | 3318.1  |         |         |
|                              | H         | 1.070327  | -0.114913 | 0.000000  |         |         |         |         |
| TS <sub>β</sub>              | C         | -0.201207 | -0.154536 | -0.528725 |         |         |         |         |
|                              | H         | -1.163185 | -0.233281 | 0.324792  |         |         |         |         |
|                              | H         | -0.671098 | 0.737134  | -0.951733 |         |         |         |         |
|                              | H         | -0.399017 | -1.100176 | -1.023183 | -2669.3 | 14.94   | 87.77   | 110.4   |
|                              | C         | 1.189604  | 0.013334  | 0.002985  | 194.29  | 204.13  | 242.77  | 343.54  |
|                              | C         | 2.187424  | -1.061213 | -0.37426  | 355.78  | 382.86  | 459.53  | 483.97  |
|                              | H         | 3.042934  | -1.018943 | 0.299951  | 587.86  | 681.49  | 786.48  | 887.32  |
|                              | H         | 1.730319  | -2.045842 | -0.29274  | 920.94  | 956.03  | 978.18  | 1020.29 |
|                              | H         | 2.545861  | -0.914296 | -1.393175 | 1055.32 | 1175    | 1195.11 | 1309.72 |
|                              | C         | 1.756052  | 1.416938  | -0.051161 | 1337.29 | 1408.26 | 1415.57 | 1421.23 |
|                              | H         | 2.106404  | 1.652587  | -1.05621  | 1469.01 | 1477.63 | 1488.92 | 1500.15 |
|                              | H         | 0.998449  | 2.141228  | 0.243483  | 1509.9  | 1575.07 | 3046.17 | 3063.56 |
|                              | H         | 2.599053  | 1.498187  | 0.63499   | 3067.61 | 3136.44 | 3141.7  | 3149.49 |
|                              | O         | 0.475637  | -0.26273  | 1.163066  | 3152.32 | 3202.21 |         |         |
|                              | O         | -2.511988 | -0.187319 | 0.503999  |         |         |         |         |
| O                            | -3.011269 | 0.199583  | -0.551966 |           |         |         |         |         |
|                              | C         | 1.393067  | -1.015851 | 0.101897  |         |         |         |         |

|          |   |           |           |           |         |         |         |         |
|----------|---|-----------|-----------|-----------|---------|---------|---------|---------|
| Butanone | H | 1.705112  | -1.397714 | -0.872222 |         |         |         |         |
|          | H | 2.268831  | -0.783668 | 0.700148  | 62.41   | 133.22  | 226.55  | 239.25  |
|          | H | 0.802964  | -1.800123 | 0.57767   | 390.1   | 531.68  | 597.7   | 777.46  |
|          | C | 0.556978  | 0.222461  | -0.107418 | 807.1   | 940.39  | 982.59  | 1008.65 |
|          | C | -0.823007 | 0.020887  | -0.695427 | 1107.79 | 1120.66 | 1230.38 | 1288.39 |
|          | H | -1.085196 | 0.916948  | -1.254999 | 1344.86 | 1391.65 | 1408.55 | 1465.12 |
|          | H | -0.821983 | -0.834465 | -1.372456 | 1478.91 | 1488.01 | 1506.13 | 1511.55 |
|          | C | -1.830098 | -0.205429 | 0.436553  | 1844.79 | 3063.87 | 3068.24 | 3077.94 |
|          | H | -2.832154 | -0.347515 | 0.036418  | 3125.54 | 3128.11 | 3145.43 | 3151.53 |
|          | H | -1.575308 | -1.088183 | 1.023544  | 3181.2  |         |         |         |
|          | H | -1.843867 | 0.654954  | 1.103725  |         |         |         |         |
|          | O | 0.949995  | 1.318419  | 0.205568  |         |         |         |         |

Table S2: Cartesian coordinates of the optimized geometries and all normal mode frequencies of the species involved in  $\text{tBuO}^\bullet + \text{HO}_2^\bullet$  reaction, calculated at M062X/def2TZVP level of theory.

| Species               | Cartesian coordinate (Å) |           |           |           | Frequencies ( $\text{cm}^{-1}$ ) |        |        |        |
|-----------------------|--------------------------|-----------|-----------|-----------|----------------------------------|--------|--------|--------|
| $\text{HO}_2^\bullet$ | O                        | 0.055087  | -0.598373 | 0.000000  |                                  |        |        |        |
|                       | O                        | 0.055087  | 0.706771  | 0.000000  | 1263.8                           | 1461.9 | 3674.8 |        |
|                       | H                        | -0.881390 | -0.867186 | 0.000000  |                                  |        |        |        |
| $\text{tBuO}^\bullet$ | C                        | -0.682952 | -1.227003 | -0.435974 |                                  |        |        |        |
|                       | H                        | -0.205304 | -2.109839 | -0.013835 |                                  |        |        |        |
|                       | H                        | -1.736840 | -1.221846 | -0.162077 | 180.3                            | 248.2  | 259.9  | 332.2  |
|                       | H                        | -0.594213 | -1.255364 | -1.522536 | 332.6                            | 382.3  | 411.9  | 431.4  |
|                       | C                        | 0.011291  | 0.055071  | 0.071532  | 763.8                            | 901.8  | 907.8  | 935.8  |
|                       | C                        | 1.497848  | 0.027819  | -0.283302 | 962.5                            | 1002.1 | 1025.8 | 1191.2 |
|                       | H                        | 1.996424  | 0.905731  | 0.129003  | 1202.0                           | 1273.4 | 1378.5 | 1382.3 |
|                       | H                        | 1.965580  | -0.863962 | 0.133007  | 1416.0                           | 1466.1 | 1479.9 | 1486.1 |



|    |   |           |           |           |         |        |        |        |
|----|---|-----------|-----------|-----------|---------|--------|--------|--------|
|    | H | 1.635027  | 0.030868  | -1.365677 | 1492.6  | 1494.0 | 1519.2 | 3063.4 |
|    | C | -0.684995 | 1.293028  | -0.493392 | 3067.9  | 3072.8 | 3139.5 | 3144.8 |
|    | H | -0.593709 | 1.323306  | -1.580174 | 3151.3  | 3152.8 | 3156.9 | 3165.3 |
|    | H | -1.740854 | 1.283961  | -0.224267 |         |        |        |        |
|    | H | -0.230516 | 2.196263  | -0.084833 |         |        |        |        |
|    | O | -0.161614 | -0.015965 | 1.439617  |         |        |        |        |
|    | C | 2.438420  | -0.421880 | -0.324433 |         |        |        |        |
|    | H | 2.554166  | -1.505670 | -0.292044 |         |        |        |        |
|    | H | 2.708264  | -0.071623 | -1.320120 | 50.7    | 70.5   | 91.5   | 120.3  |
|    | H | 3.118430  | 0.018998  | 0.405062  | 189.1   | 212.1  | 260.8  | 265.9  |
|    | C | 0.996477  | -0.037716 | -0.004107 | 329.9   | 345.1  | 416.4  | 420.3  |
|    | C | 0.555177  | -0.522169 | 1.375681  | 468.9   | 592.6  | 759.6  | 868.2  |
|    | H | -0.461240 | -0.191017 | 1.587024  | 928.0   | 937.9  | 969.1  | 1021.2 |
| RC | H | 0.593657  | -1.611350 | 1.420635  | 1037.0  | 1164.2 | 1221.8 | 1269.3 |
|    | H | 1.222111  | -0.124600 | 2.141320  | 1293.8  | 1376.0 | 1388.8 | 1418.3 |
|    | C | 0.807491  | 1.498713  | -0.112944 | 1464.4  | 1483.0 | 1488.2 | 1490.0 |
|    | H | 1.452990  | 1.955242  | 0.638146  | 1497.9  | 1520.9 | 1553.4 | 3067.4 |
|    | H | 1.100215  | 1.848114  | -1.101436 | 3071.2  | 3074.4 | 3143.9 | 3149.4 |
|    | H | -0.229951 | 1.762228  | 0.084102  | 3156.8  | 3159.1 | 3161.9 | 3177.3 |
|    | O | 0.148935  | -0.510751 | -0.987119 | 3370.9  |        |        |        |
|    | O | -2.518867 | -0.588463 | -0.367101 |         |        |        |        |
|    | H | -1.576101 | -0.699063 | -0.647079 |         |        |        |        |
|    | O | -2.538560 | 0.538846  | 0.289121  |         |        |        |        |
|    | C | 2.326959  | -0.567174 | -0.121214 |         |        |        |        |
|    | H | 2.450397  | -1.418601 | 0.545600  |         |        |        |        |
|    | H | 2.515989  | -0.876291 | -1.147187 |         |        |        |        |
|    | H | 3.027779  | 0.219360  | 0.160475  | -1189.9 | 14.2   | 81.0   | 104.4  |

|                 |    |           |           |           |           |        |        |        |
|-----------------|----|-----------|-----------|-----------|-----------|--------|--------|--------|
| TS <sub>H</sub> | C  | 0.895550  | 0.017023  | 0.010672  | 170.2     | 189.3  | 264.1  | 266.4  |
|                 | C  | 0.619250  | 0.425016  | 1.455103  | 333.5     | 337.6  | 387.6  | 407.3  |
|                 | H  | -0.396926 | 0.808254  | 1.548847  | 467.2     | 535.1  | 754.2  | 841.4  |
|                 | H  | 0.736431  | -0.434714 | 2.115117  | 921.0     | 928.4  | 961.9  | 967.0  |
|                 | H  | 1.310906  | 1.207357  | 1.769590  | 1043.0    | 1112.8 | 1166.0 | 1206.8 |
|                 | C  | 0.725551  | 1.184135  | -0.967517 | 1270.4    | 1369.8 | 1384.2 | 1415.2 |
|                 | H  | 1.405655  | 1.992931  | -0.697904 | 1463.2    | 1478.8 | 1485.3 | 1492.8 |
|                 | H  | 0.942460  | 0.855799  | -1.983228 | 1496.5    | 1520.6 | 1544.3 | 1710.4 |
|                 | H  | -0.296401 | 1.559665  | -0.923011 | 3068.9    | 3072.7 | 3075.0 | 3147.9 |
|                 | O  | 0.101796  | -1.043112 | -0.379357 | 3153.4    | 3156.4 | 3161.1 | 3163.9 |
|                 | O  | -2.334299 | -0.689122 | -0.143943 | 3175.2    |        |        |        |
|                 | H  | -1.316478 | -0.899451 | -0.193148 |           |        |        |        |
|                 | O  | -2.490455 | 0.561196  | 0.091124  |           |        |        |        |
|                 | PC | C         | 2.654057  | 0.143855  | -0.037854 |        |        |        |
| H               |    | 2.974311  | 0.430773  | -1.039695 |           |        |        |        |
| H               |    | 2.970359  | 0.919258  | 0.660200  | 5.9       | 28.0   | 37.2   | 37.9   |
| H               |    | 3.139726  | -0.794330 | 0.232804  | 50.2      | 203.7  | 269.6  | 281.0  |
| C               |    | 1.142117  | -0.004811 | 0.001318  | 310.1     | 346.6  | 349.0  | 421.0  |
| C               |    | 0.674869  | -1.050796 | -1.005513 | 467.0     | 472.8  | 771.7  | 924.9  |
| H               |    | -0.415120 | -1.131630 | -0.996408 | 939.2     | 959.9  | 965.8  | 1036.1 |
| H               |    | 0.991052  | -0.769048 | -2.010210 | 1049.2    | 1169.0 | 1261.8 | 1276.0 |
| H               |    | 1.086300  | -2.033524 | -0.769558 | 1366.8    | 1398.0 | 1409.6 | 1426.4 |
| C               |    | 0.669531  | -0.360296 | 1.407145  | 1471.2    | 1481.4 | 1484.7 | 1497.8 |
| H               |    | 1.081725  | -1.317975 | 1.729050  | 1506.9    | 1517.8 | 1764.8 | 3054.1 |
| H               |    | 0.980930  | 0.411416  | 2.111596  | 3057.5    | 3069.9 | 3123.5 | 3129.1 |
| H               |    | -0.420422 | -0.436029 | 1.437513  | 3143.4    | 3144.3 | 3149.7 | 3151.1 |
| O               |    | 0.630577  | 1.276247  | -0.366299 | 3858.3    |        |        |        |

|                |          |           |           |           |        |        |        |        |        |
|----------------|----------|-----------|-----------|-----------|--------|--------|--------|--------|--------|
|                | O        | -2.763421 | 0.582816  | -0.163897 |        |        |        |        |        |
|                | H        | -0.331114 | 1.233990  | -0.358200 |        |        |        |        |        |
|                | O        | -3.229805 | -0.469139 | 0.131738  |        |        |        |        |        |
| tBuOH          | C        | -0.718055 | -1.251445 | -0.546804 |        |        |        |        |        |
|                | H        | -0.274970 | -2.156857 | -0.131550 |        |        |        |        |        |
|                | H        | -1.788094 | -1.264458 | -0.338538 | 203.4  | 270.1  | 282.0  | 312.2  |        |
|                | H        | -0.568707 | -1.248713 | -1.627104 | 346.0  | 349.3  | 421.0  | 467.2  |        |
|                | C        | -0.080733 | -0.024420 | 0.084475  | 473.1  | 771.8  | 925.7  | 939.8  |        |
|                | C        | 1.425562  | -0.013030 | -0.153301 | 961.9  | 966.2  | 1035.4 | 1050.8 |        |
|                | H        | 1.883026  | 0.854471  | 0.329346  | 1167.6 | 1261.9 | 1276.6 | 1365.8 |        |
|                | H        | 1.875625  | -0.915576 | 0.260944  | 1399.5 | 1410.2 | 1426.4 | 1472.1 |        |
|                | H        | 1.653569  | 0.036494  | -1.219250 | 1481.7 | 1485.2 | 1498.5 | 1508.0 |        |
|                | C        | -0.720927 | 1.253302  | -0.447706 | 1517.8 | 3051.2 | 3055.3 | 3069.1 |        |
|                | H        | -0.569932 | 1.348076  | -1.524231 | 3121.4 | 3127.5 | 3142.9 | 3143.8 |        |
|                | H        | -1.791624 | 1.247861  | -0.242022 | 3149.0 | 3150.7 | 3858.0 |        |        |
|                | H        | -0.280857 | 2.131085  | 0.032503  |        |        |        |        |        |
|                | O        | -0.343688 | -0.145080 | 1.482716  |        |        |        |        |        |
| H              | 0.042958 | 0.613258  | 1.931979  |           |        |        |        |        |        |
| O <sub>2</sub> | O        | 0.000000  | 0.000000  | 0.594124  |        |        |        |        | 1765.5 |
|                | O        | 0.000000  | 0.000000  | -0.594124 |        |        |        |        |        |

Figure S1: Comparison of potential energy surface along with optimized geometries of stationary points for  $t\text{BuO}^\bullet + \text{HO}_2^\bullet$  reaction, obtained at CCSD(T)/CBS//M062X/aug-cc-pVTZ level of theory with the same calculated at CCSD(T)/CBS//M062X/def2TZVP level of theory. The energetics at CCSD(T)/CBS//M062X/def2TZVP level of theory are shown in paranthesis. Similarly, bond lengths at M062X/def2TZVP level of theory are shown in paranthesis ( $\text{\AA}$ ).

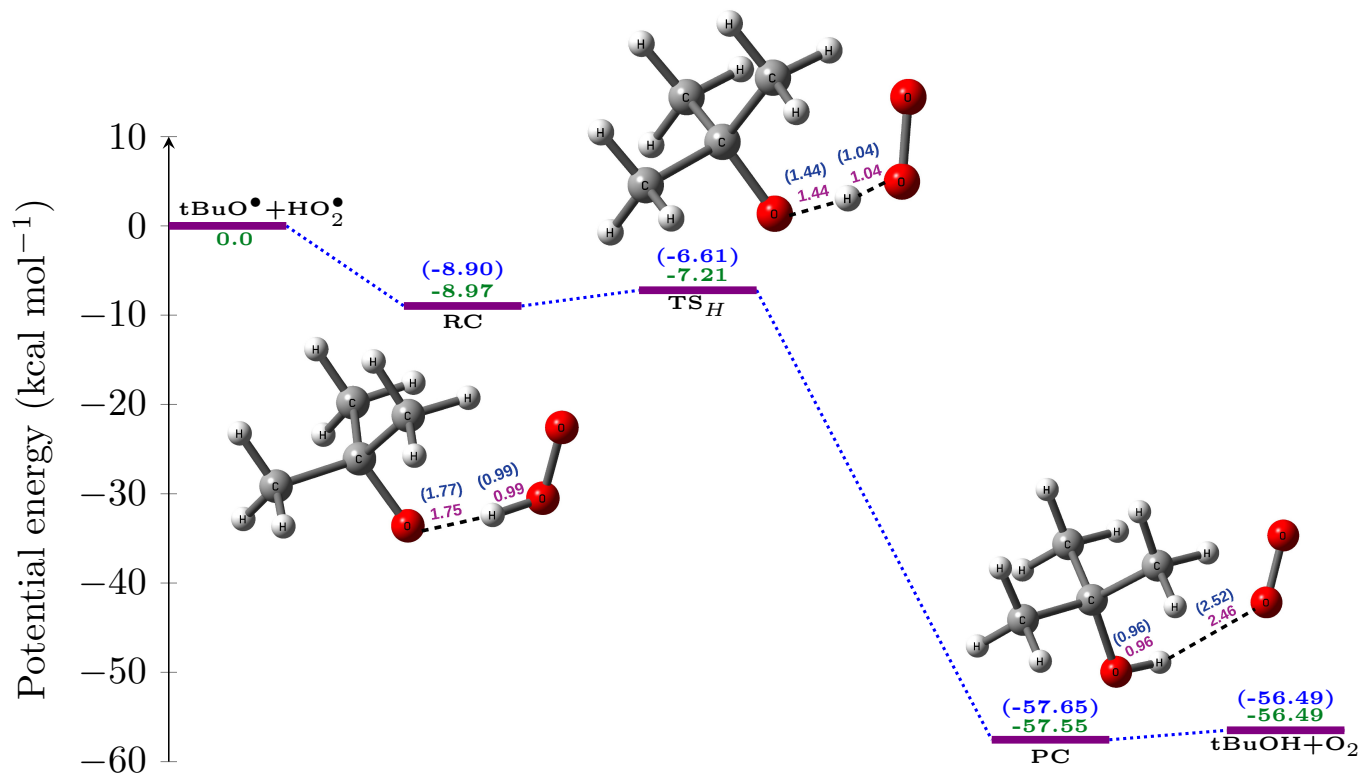

Figure S2: IRC for the transition state ( $\text{TS}_H$ ) of the  $t\text{BuO}^\bullet + \text{HO}_2^\bullet$  reaction obtained at M062X/aug-cc-pVTZ level of theory.

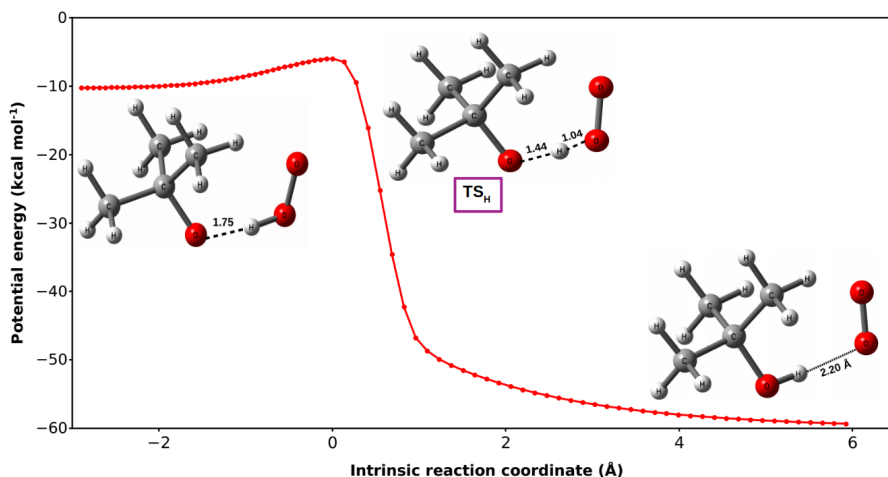

Table S3: Transition state theory rate constants ( $k_{TST}$ ) for the isomerization path along with zero curvature tunneling ( $\tau_{ZCT}$ ), Eckart tunneling contributions ( $\tau_{Eckart}$ ), and small curvature tunneling ( $\tau_{SCT}$ ) within the temperature range 213–450 K and pressure =1.0 atm.

| T   | $k_{TST}$              | $\tau_{ZCT}$       | $\tau_{Eckart}$    | $\tau_{SCT}$       |
|-----|------------------------|--------------------|--------------------|--------------------|
| 213 | $1.84 \times 10^{-13}$ | $2.40 \times 10^7$ | $1.25 \times 10^8$ | $1.28 \times 10^8$ |
| 216 | $4.30 \times 10^{-13}$ | $1.28 \times 10^7$ | $6.51 \times 10^7$ | $6.64 \times 10^7$ |
| 219 | $9.83 \times 10^{-13}$ | $6.96 \times 10^6$ | $3.47 \times 10^7$ | $3.52 \times 10^7$ |
| 224 | $3.72 \times 10^{-12}$ | $2.67 \times 10^6$ | $1.28 \times 10^7$ | $1.29 \times 10^7$ |
| 235 | $5.68 \times 10^{-11}$ | $3.97 \times 10^5$ | $1.74 \times 10^6$ | $1.73 \times 10^6$ |
| 250 | $1.59 \times 10^{-9}$  | $4.41 \times 10^4$ | $1.72 \times 10^5$ | $1.70 \times 10^5$ |
| 259 | $9.79 \times 10^{-9}$  | $1.43 \times 10^4$ | $5.18 \times 10^4$ | $5.14 \times 10^4$ |
| 260 | $1.19 \times 10^{-8}$  | $1.27 \times 10^4$ | $4.57 \times 10^4$ | $4.54 \times 10^4$ |
| 265 | $3.07 \times 10^{-8}$  | $7.24 \times 10^3$ | $2.50 \times 10^4$ | $2.49 \times 10^4$ |
| 270 | $7.64 \times 10^{-8}$  | $4.28 \times 10^3$ | $1.42 \times 10^4$ | $1.42 \times 10^4$ |
| 278 | $3.08 \times 10^{-7}$  | $1.98 \times 10^3$ | $6.15 \times 10^3$ | $6.18 \times 10^3$ |
| 280 | $4.31 \times 10^{-7}$  | $1.65 \times 10^3$ | $5.05 \times 10^3$ | $5.09 \times 10^3$ |
| 290 | $2.16 \times 10^{-6}$  | $7.19 \times 10^2$ | $2.03 \times 10^3$ | $2.07 \times 10^3$ |
| 298 | $7.24 \times 10^{-6}$  | $4.01 \times 10^2$ | $1.06 \times 10^3$ | $1.09 \times 10^3$ |
| 300 | $9.70 \times 10^{-6}$  | $3.50 \times 10^2$ | $9.14 \times 10^2$ | $9.39 \times 10^2$ |
| 310 | $3.96 \times 10^{-5}$  | $1.87 \times 10^2$ | $4.54 \times 10^2$ | $4.70 \times 10^2$ |
| 320 | $1.48 \times 10^{-4}$  | $1.09 \times 10^2$ | $2.45 \times 10^2$ | $2.57 \times 10^2$ |
| 350 | $4.96 \times 10^{-3}$  | $3.21 \times 10^1$ | $5.98 \times 10^1$ | $6.40 \times 10^1$ |
| 400 | $5.39 \times 10^{-1}$  | $9.83 \times 10^0$ | $1.48 \times 10^1$ | $1.59 \times 10^1$ |
| 425 | $3.73 \times 10^0$     | $6.82 \times 10^0$ | $9.60 \times 10^0$ | $1.02 \times 10^1$ |
| 450 | $2.09 \times 10^1$     | $5.16 \times 10^0$ | $6.91 \times 10^0$ | $7.26 \times 10^0$ |

Table S4: Pressure dependent overall bimolecular rate constants in  $\text{cm}^3 \text{ molecule}^{-1} \text{ sec}^{-1}$  for  $\text{tBuO}^\bullet + \text{HO}_2$  reaction within temperature range of 213–450 K.

| T (K) | Pressure (atm)         |                        |                        |                        |                        |
|-------|------------------------|------------------------|------------------------|------------------------|------------------------|
|       | 0.1                    | 0.5                    | 1.0                    | 5.0                    | 10.0                   |
| 213   | $8.67 \times 10^{-12}$ |
| 216   | $8.64 \times 10^{-12}$ |
| 219   | $8.60 \times 10^{-12}$ |
| 224   | $8.52 \times 10^{-12}$ |
| 235   | $8.28 \times 10^{-12}$ |
| 250   | $7.87 \times 10^{-12}$ |
| 259   | $7.59 \times 10^{-12}$ |
| 260   | $7.55 \times 10^{-12}$ |
| 265   | $7.39 \times 10^{-12}$ |
| 270   | $7.22 \times 10^{-12}$ |
| 278   | $6.95 \times 10^{-12}$ |
| 280   | $6.88 \times 10^{-12}$ |
| 290   | $6.53 \times 10^{-12}$ |
| 298   | $6.26 \times 10^{-12}$ |
| 300   | $6.19 \times 10^{-12}$ |
| 310   | $5.85 \times 10^{-12}$ |
| 320   | $5.53 \times 10^{-12}$ |
| 350   | $4.63 \times 10^{-12}$ |
| 400   | $3.44 \times 10^{-12}$ |
| 425   | $2.99 \times 10^{-12}$ |
| 450   | $2.60 \times 10^{-12}$ |

Figure S3: Gibbs free energy profile for decomposition (panel A), isomerization (panel B), and  $t\text{BuO}^\bullet + \text{HO}_2^\bullet$  reaction (panel C) obtained at CCSD(T)/CBS level of theory at 298 K.

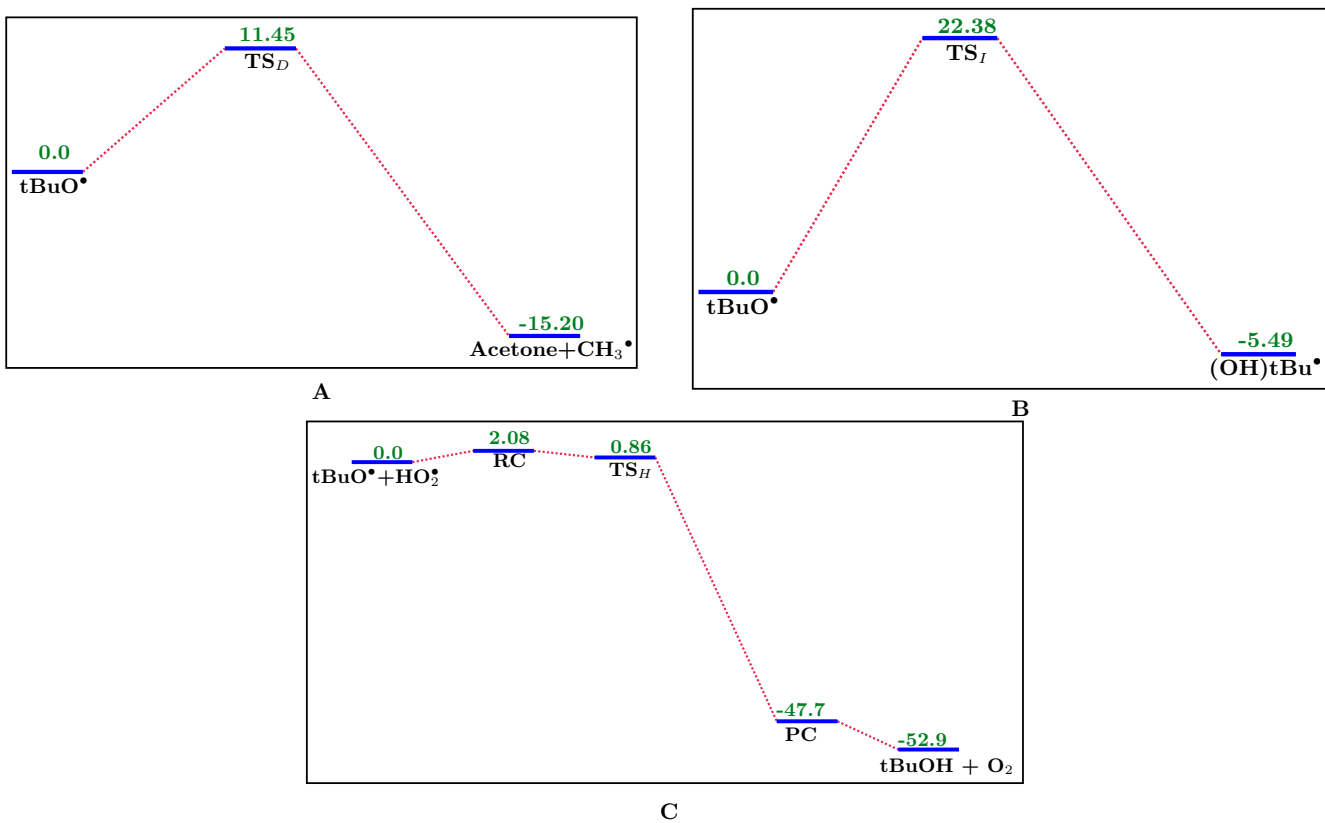

Figure S4: Potential energy surface for  $\text{tBuO}^\bullet + \text{O}_2$  reaction (ZPE corrected) obtained at CCSD(T)/CBS//M062X/aug-cc-pVTZ level of theory.

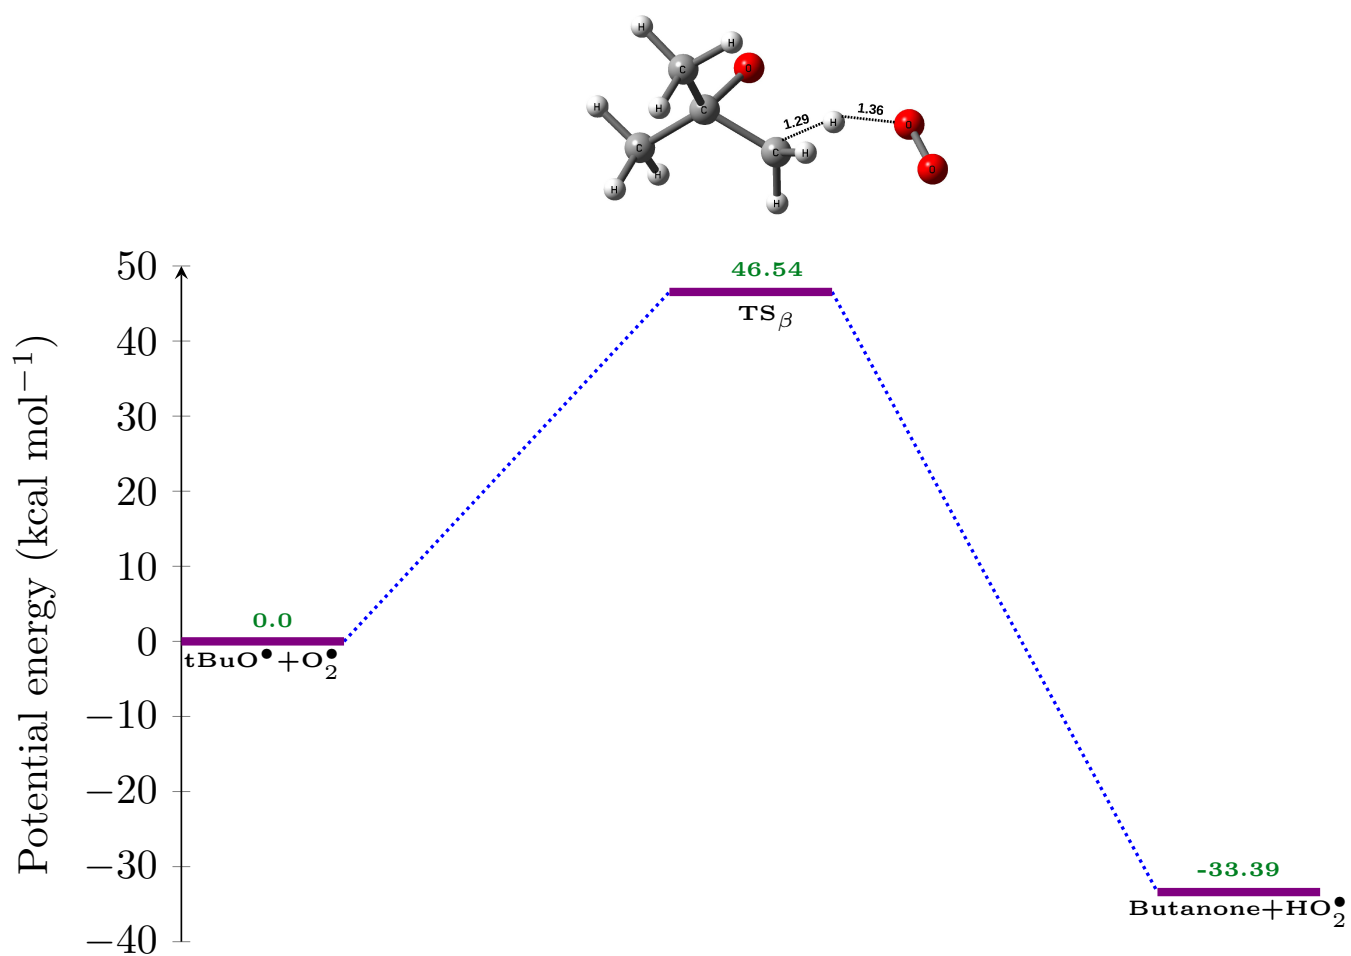



Table S5: Transition state theory rate constants augmented with Eckart tunneling contributions ( $k_{TST/Eckart}$ ) for the  $t\text{BuO}\cdot + \text{O}_2$  reaction along with effective rate constants ( $k_{Eff}$ ) within the temperature range 213-450 K and pressure =1.0 atm. The concentration of co-reactant ( $\text{O}_2$ ) is known to be  $\sim 10^{18}$  molecule  $\text{cm}^{-3}$ .

| T(K) | $k_{TST/Eckart}$       | $k_{Eff}$              |
|------|------------------------|------------------------|
| 213  | $5.70 \times 10^{-37}$ | $5.70 \times 10^{-19}$ |
| 216  | $6.46 \times 10^{-37}$ | $6.46 \times 10^{-19}$ |
| 219  | $7.34 \times 10^{-37}$ | $7.34 \times 10^{-19}$ |
| 224  | $9.06 \times 10^{-37}$ | $9.06 \times 10^{-19}$ |
| 235  | $1.45 \times 10^{-36}$ | $1.45 \times 10^{-18}$ |
| 250  | $2.80 \times 10^{-36}$ | $2.80 \times 10^{-18}$ |
| 259  | $4.19 \times 10^{-36}$ | $4.19 \times 10^{-18}$ |
| 260  | $4.38 \times 10^{-36}$ | $4.38 \times 10^{-18}$ |
| 265  | $5.49 \times 10^{-36}$ | $5.49 \times 10^{-18}$ |
| 270  | $6.89 \times 10^{-36}$ | $6.89 \times 10^{-18}$ |
| 278  | $9.96 \times 10^{-36}$ | $9.96 \times 10^{-18}$ |
| 280  | $1.09 \times 10^{-35}$ | $1.09 \times 10^{-17}$ |
| 290  | $1.75 \times 10^{-35}$ | $1.75 \times 10^{-17}$ |
| 298  | $2.56 \times 10^{-35}$ | $2.56 \times 10^{-17}$ |
| 300  | $2.81 \times 10^{-35}$ | $2.81 \times 10^{-17}$ |
| 310  | $4.56 \times 10^{-35}$ | $4.56 \times 10^{-17}$ |
| 320  | $7.45 \times 10^{-35}$ | $7.45 \times 10^{-17}$ |
| 350  | $3.40 \times 10^{-34}$ | $3.40 \times 10^{-16}$ |
| 400  | $4.94 \times 10^{-33}$ | $4.94 \times 10^{-15}$ |
| 425  | $2.01 \times 10^{-32}$ | $2.01 \times 10^{-14}$ |
| 450  | $8.54 \times 10^{-32}$ | $8.54 \times 10^{-14}$ |

### Details of the kinetics

The mechanism of  $\text{tBuO}^\bullet + \text{HO}_2^\bullet$  reaction can be represented as follows:

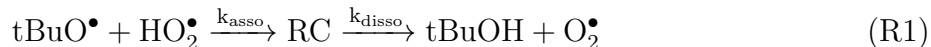

This reaction occurs in two steps; in the first step, a barrierless association of  $\text{tBuO}^\bullet$  and  $\text{HO}_2^\bullet$  takes place which forms RC, and in the next, RC undergoes unimolecular dissociation to form products. The overall rate constants for  $\text{tBuO}^\bullet + \text{HO}_2^\bullet$  reaction have been computed using master equation as implemented in the MESMER software package.<sup>1</sup> MESMER uses inverse laplace transformation (ILT) method for the barrierless association process, and for the unimolecular dissociation process, MESMER uses Rice-Ramsperger-Kassel-Marcus (RRKM) theory. The ILT method (for the first step) requires an Arrhenius pre-exponential factor for the barrierless association, which has been computed using KTOOLS program as implemented in the MultiWell suite of programs.<sup>2</sup> Lennard-Jones (L-J) model is used to calculate the collisional frequency between reactants and bath gas, and as a bath gas, air is employed to mimic the atmospheric environment with L-J parameters,  $\sigma=3.68 \text{ \AA}$  and  $\epsilon=86.2 \text{ K}$ . For the L-J parameters of RC, we need L-J parameters of reactants, i.e.,  $\text{tBuO}^\bullet$  and  $\text{HO}_2^\bullet$ . Zhang et al.<sup>3</sup> recommended the L-J parameters for  $\text{tBuO}^\bullet$  to be  $\sigma=5.85 \text{ \AA}$  and  $\epsilon=326.6 \text{ K}$ , whereas for  $\text{HO}_2^\bullet$ , we have taken the L-J parameters of  $\text{O}_2$  ( $\sigma=3.39 \text{ \AA}$  and  $\epsilon=121.7 \text{ K}$ ) due to their similar sizes. Thus, using the combining rule,<sup>4</sup> L-J parameters for RC can be calculated using following equations:

$$\sigma_{\text{RC}} = \frac{1}{2}(\sigma_{\text{tBuO}^\bullet} + \sigma_{\text{HO}_2^\bullet})$$
$$(\epsilon/k_{\text{B}})_{\text{RC}} = [(\epsilon/k_{\text{B}})_{\text{tBuO}^\bullet}(\epsilon/k_{\text{B}})_{\text{HO}_2^\bullet}]^{1/2}$$

The L-J parameters for RC using above equations turns out to be,  $\sigma=4.62 \text{ \AA}$  and  $\epsilon=199.37 \text{ K}$ . A single-exponential down model is used to describe the collisional energy transfer probability with an energy grain size of  $100 \text{ cm}^{-1}$  and  $\Delta E_{\text{down}} = 200 \text{ cm}^{-1}$ .

Table S6: Bimolecular rate constants,  $k_b$  (in  $\text{cm}^3 \text{ molecule}^{-1} \text{ sec}^{-1}$ ) and effective rate constants,  $k_{eff}$  (in  $\text{sec}^{-1}$ ) for  $\text{tBuO}^\bullet + \text{HO}_2^\bullet$  reaction using MESMER software package within 213–450 K and pressure =1.0 atm.

| T(K) | $k_b$                  | $k_{eff}$             |
|------|------------------------|-----------------------|
| 213  | $2.04 \times 10^{-12}$ | $6.13 \times 10^{-4}$ |
| 216  | $2.04 \times 10^{-12}$ | $6.12 \times 10^{-4}$ |
| 219  | $2.04 \times 10^{-12}$ | $6.12 \times 10^{-4}$ |
| 224  | $2.04 \times 10^{-12}$ | $6.11 \times 10^{-4}$ |
| 235  | $2.03 \times 10^{-12}$ | $6.09 \times 10^{-4}$ |
| 250  | $2.02 \times 10^{-12}$ | $6.07 \times 10^{-4}$ |
| 259  | $2.02 \times 10^{-12}$ | $6.06 \times 10^{-4}$ |
| 260  | $2.02 \times 10^{-12}$ | $6.06 \times 10^{-4}$ |
| 265  | $2.02 \times 10^{-12}$ | $6.05 \times 10^{-4}$ |
| 270  | $2.02 \times 10^{-12}$ | $6.05 \times 10^{-4}$ |
| 278  | $2.01 \times 10^{-12}$ | $6.04 \times 10^{-4}$ |
| 280  | $2.01 \times 10^{-12}$ | $6.03 \times 10^{-4}$ |
| 290  | $2.01 \times 10^{-12}$ | $6.02 \times 10^{-4}$ |
| 298  | $2.00 \times 10^{-12}$ | $6.01 \times 10^{-4}$ |
| 300  | $2.00 \times 10^{-12}$ | $6.01 \times 10^{-4}$ |
| 310  | $2.00 \times 10^{-12}$ | $5.99 \times 10^{-4}$ |
| 320  | $1.99 \times 10^{-12}$ | $5.98 \times 10^{-4}$ |
| 350  | $1.98 \times 10^{-12}$ | $5.93 \times 10^{-4}$ |
| 400  | $1.95 \times 10^{-12}$ | $5.85 \times 10^{-4}$ |
| 425  | $1.94 \times 10^{-12}$ | $5.81 \times 10^{-4}$ |
| 450  | $1.92 \times 10^{-12}$ | $5.76 \times 10^{-4}$ |

## References

- (1) Glowacki, D. R.; Liang, C.-H.; Morley, C.; Pilling, M. J.; Robertson, S. H. MESMER: an open-source master equation solver for multi-energy well reactions. *J. Phys. Chem. A* **2012**, *116*, 9545–9560.
- (2) Barker, J.; Nguyen, T.; Stanton, J.; Aieta, C.; Ceotto, M.; Gabas, F.; Kumar, T.; Li, C.; Lohr, L.; Maranzana, A. MultiWell-2021 Software Suite; J. R. Barker, University of Michigan, Ann Arbor, Michigan, USA. **2021**, <http://claspresearch.engin.umich.edu/multiwell/>.
- (3) Zhang, P.; Klippenstein, S. J.; Law, C. K. Ab initio kinetics for the decomposition of hydroxybutyl and butoxy radicals of n-butanol. *J. Phys. Chem. A* **2013**, *117*, 1890–1906.
- (4) Schnabel, T.; Vrabec, J.; Hasse, H. Unlike Lennard–Jones parameters for vapor–liquid equilibria. *J. Mol. Liq.* **2007**, *135*, 170–178.
